# Supplementary material for: The effects of menstrual cycle phase on physical performance in female soccer players
Source: PubMed Central journal article supplement (PMC5348024; doi:10.1371/journal.pone.0173951), 2017-03-13
Supplement: pone.0173951.s001.pdf [file pone.0173951.s001.pdf]

| Subject number | Age (y) | Height (cm) | Weight (kg) FP | Weight (kg) LP | Body fat (%) FP | Body fat (%) LP |
|----------------|---------|-------------|----------------|----------------|-----------------|-----------------|
| 1              | 17      | 160         | 56.3           | 56.4           | 15.6            | 16.1            |
| 2              | 17      | 169         | 65.1           | 65.3           | 18.6            | 19.2            |
| 3              | 17      | 165         | 62.9           | 61             | 16.4            | 17              |
| 4              | 17      | 171.5       | 74.1           | 73.7           | 22.6            | 22              |
| 5              | 21      | 156.5       | 50.9           | 50.7           | 14.3            | 14.5            |
| 6              | 28      | 163.5       | 62.6           | 61.8           | 18.9            | 18.6            |
| 7              | 16      | 160         | 51.9           | 52.2           | 17.7            | 17.9            |
| 8              | 17      | 153.5       | 56.5           | 57             | 19.4            | 18.8            |
| 9              | 17      | 152.5       | 51.5           | 51.4           | 15.6            | 16              |

*Note: FP = Follicular phase; LP = Luteal phase*

| Subject number | Phase      | Counter movement jump (cm) | Sprint 5 m split (s) | Sprint 10 m split (s) | Sprint full 30 m (s) | Yo-Yo IET | Lactate pre | Lactate 1 min post | Lactate 3 min post | Lactate 5 min post | Heart rate pre | Max heart rate | RPE |
|----------------|------------|----------------------------|----------------------|-----------------------|----------------------|-----------|-------------|--------------------|--------------------|--------------------|----------------|----------------|-----|
| 1              | Follicular | 25                         | 1.01                 | 1.89                  | 4.77                 | 2320      | 2.72        | 9.75               | 8.97               | 8.83               | 110            | 195            | 19  |
| 2              | Follicular | 29                         | 1.14                 | 1.94                  | 4.72                 | 2640      | 2.1         | 8.18               | 7.66               | 7.45               | 106            | 193            | 18  |
| 3              | Follicular | 29                         | 1.13                 | 1.92                  | 4.81                 | 3360      | 1.85        | 9.50               | 8.84               | 8.80               | 90             | 186            | 19  |
| 4              | Follicular | 34                         | 0.98                 | 1.74                  | 4.43                 | 2240      | 4.2         | 12.4               | 11.6               | 11.4               | 115            | 196            | 20  |
| 5              | Follicular | 30                         | 1.03                 | 1.79                  | 4.58                 | 3880      | 2.19        | 9.25               | 9.60               | 9.59               | 74             | 195            | 18  |
| 6              | Follicular | 27                         | 1.13                 | 1.93                  | 4.72                 | 3200      | 1.82        | 8.06               | 7.41               | 6.82               | 82             | 189            | 18  |
| 7              | Follicular | 36                         | 1.08                 | 1.83                  | 4.62                 | 3280      | 1.6         | 9.84               | 9.16               | 9.03               | 120            | 196            | 19  |
| 8              | Follicular | 26                         | 1.12                 | 1.91                  | 4.7                  | 4560      | 2.27        | 8.51               | 8.73               | 8.71               | 85             | 195            | 18  |
| 9              | Follicular | 25                         | 1.05                 | 1.83                  | 4.67                 | 4120      | 1.8         | 7.8                | 7.59               | 7.35               | 89             | 198            | 19  |
|                |            |                            |                      |                       |                      |           |             |                    |                    |                    |                |                |     |
| 1              | Luteal     | 27                         | 1.04                 | 1.90                  | 4.77                 | 1960      | 2.03        | 8.10               | 7.87               | 7.59               | 114            | 195            | 19  |
| 2              | Luteal     | 28                         | 1.14                 | 1.95                  | 4.76                 | 2200      | 2.33        | 8.53               | 6.15               | 5.8                | 106            | 198            | 20  |
| 3              | Luteal     | 29                         | 1.13                 | 1.91                  | 4.71                 | 2720      | 3.79        | 8.11               | 7.81               | 3.52               | 92             | 191            | 19  |
| 4              | Luteal     | 34                         | 0.98                 | 1.79                  | 4.51                 | 1760      | 1.99        | 9.64               | 9.18               | 9.24               | 117            | 199            | 19  |
| 5              | Luteal     | 32                         | 1.04                 | 1.83                  | 4.61                 | 2240      | 1.82        | 9.45               | 8.92               | 8.51               | 102            | 185            | 17  |
| 6              | Luteal     | 27                         | 1.11                 | 1.89                  | 4.67                 | 3480      | 2.1         | 8.79               | 7.26               | 5.18               | 88             | 189            | 19  |
| 7              | Luteal     | 34                         | 1.05                 | 1.84                  | 4.52                 | 3160      | 2.24        | 7.55               | 7.01               | 7.15               | 123            | 196            | 18  |
| 8              | Luteal     | 27                         | 1.14                 | 1.94                  | 4.76                 | 3320      | 1.67        | 8.89               | 7.86               | 8.84               | 96             | 196            | 18  |
| 9              | Luteal     | 28                         | 1.04                 | 1.83                  | 4.72                 | 4560      | 0.94        | 8.50               | 7.08               | 6.23               | 106            | 192            | 18  |

| Subject number | Oestrogen (pg/ml) FP | Oestrogen (pg/ml) LP | Progesterone (nmol/l) FP | Progesterone (nmol/l) LP |
|----------------|----------------------|----------------------|--------------------------|--------------------------|
| 1              | 28.95                | 37.67                | 1.91                     | 4.10                     |
| 2              | 64.22                | 102.40               | 2.39                     | 3.75                     |
| 3              | 19.87                | 55.16                | 1.75                     | 6.11                     |
| 4              | 61.79                | 150.60               | 2.35                     | 8.97                     |
| 5              | 22.79                | 72.12                | 1.84                     | 8.17                     |
| 6              | 5.00                 | 106.40               | 2.67                     | 5.28                     |
| 7              | 5.00                 | 85.00                | 1.46                     | 5.50                     |
| 8              | 22.53                | 195.00               | 3.50                     | 9.32                     |
| 9              | 10.70                | 184.20               | 2.32                     | 7.12                     |

*Note: FP = Follicular phase; LP = Luteal phase*
